# Supplementary material for: Fungi found in Mediterranean and North Sea sponges: how specific are they?
Source: PubMed Central journal article supplement (PMC5591636; doi:10.7717/peerj.3722), 2017-09-06

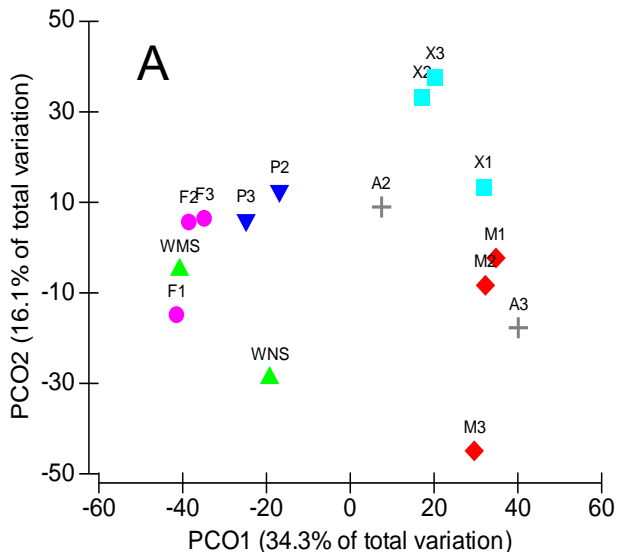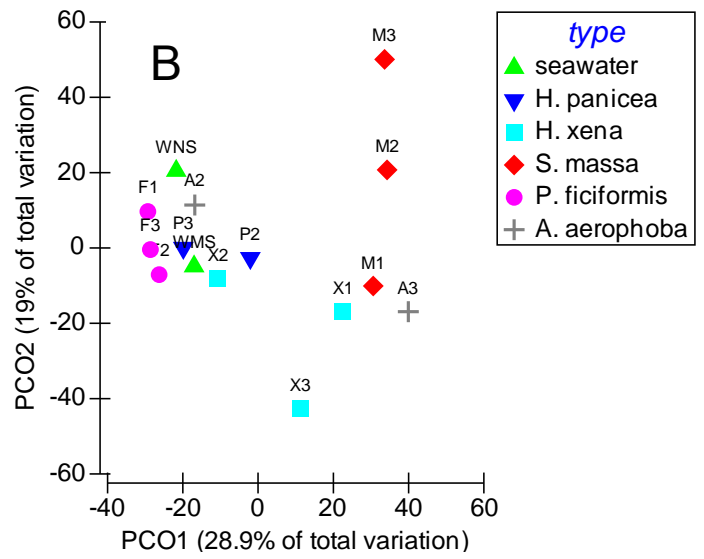

Supplement: peerj-05-3722-s004.pdf [file peerj-05-3722-s004.pdf]
